# Supplementary material for: HLA Class II Defects in Burkitt Lymphoma: Bryostatin-1-Induced 17 kDa Protein Restores CD4+ T-Cell Recognition
Source: Hindawi journal article supplement (doi:10.1155/2011/780839), 2011-01-01

Hossain et al. Supplemental Figure 1.

**A** HSA<sub>64-76</sub> epitope presentation

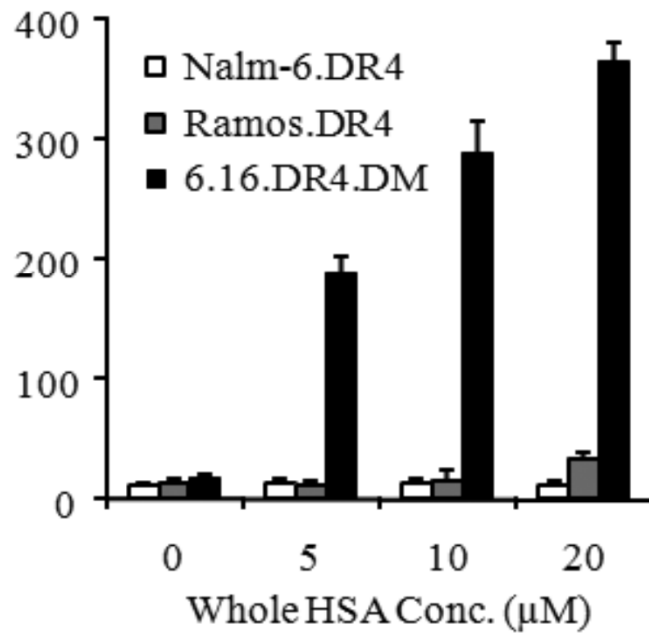

**B** HSA<sub>64-76K</sub> peptide presentation

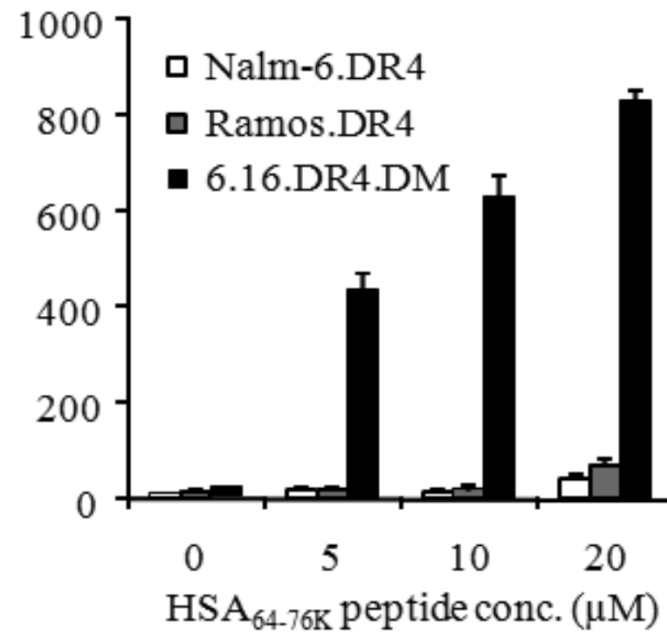

Supplement: f1 [file 780839.f1.pdf]
